# Supplementary material
Source: PubMed Central journal article supplement (PMC1489915)

PCMP-PLS-npl-A1I6A3I50.fastme

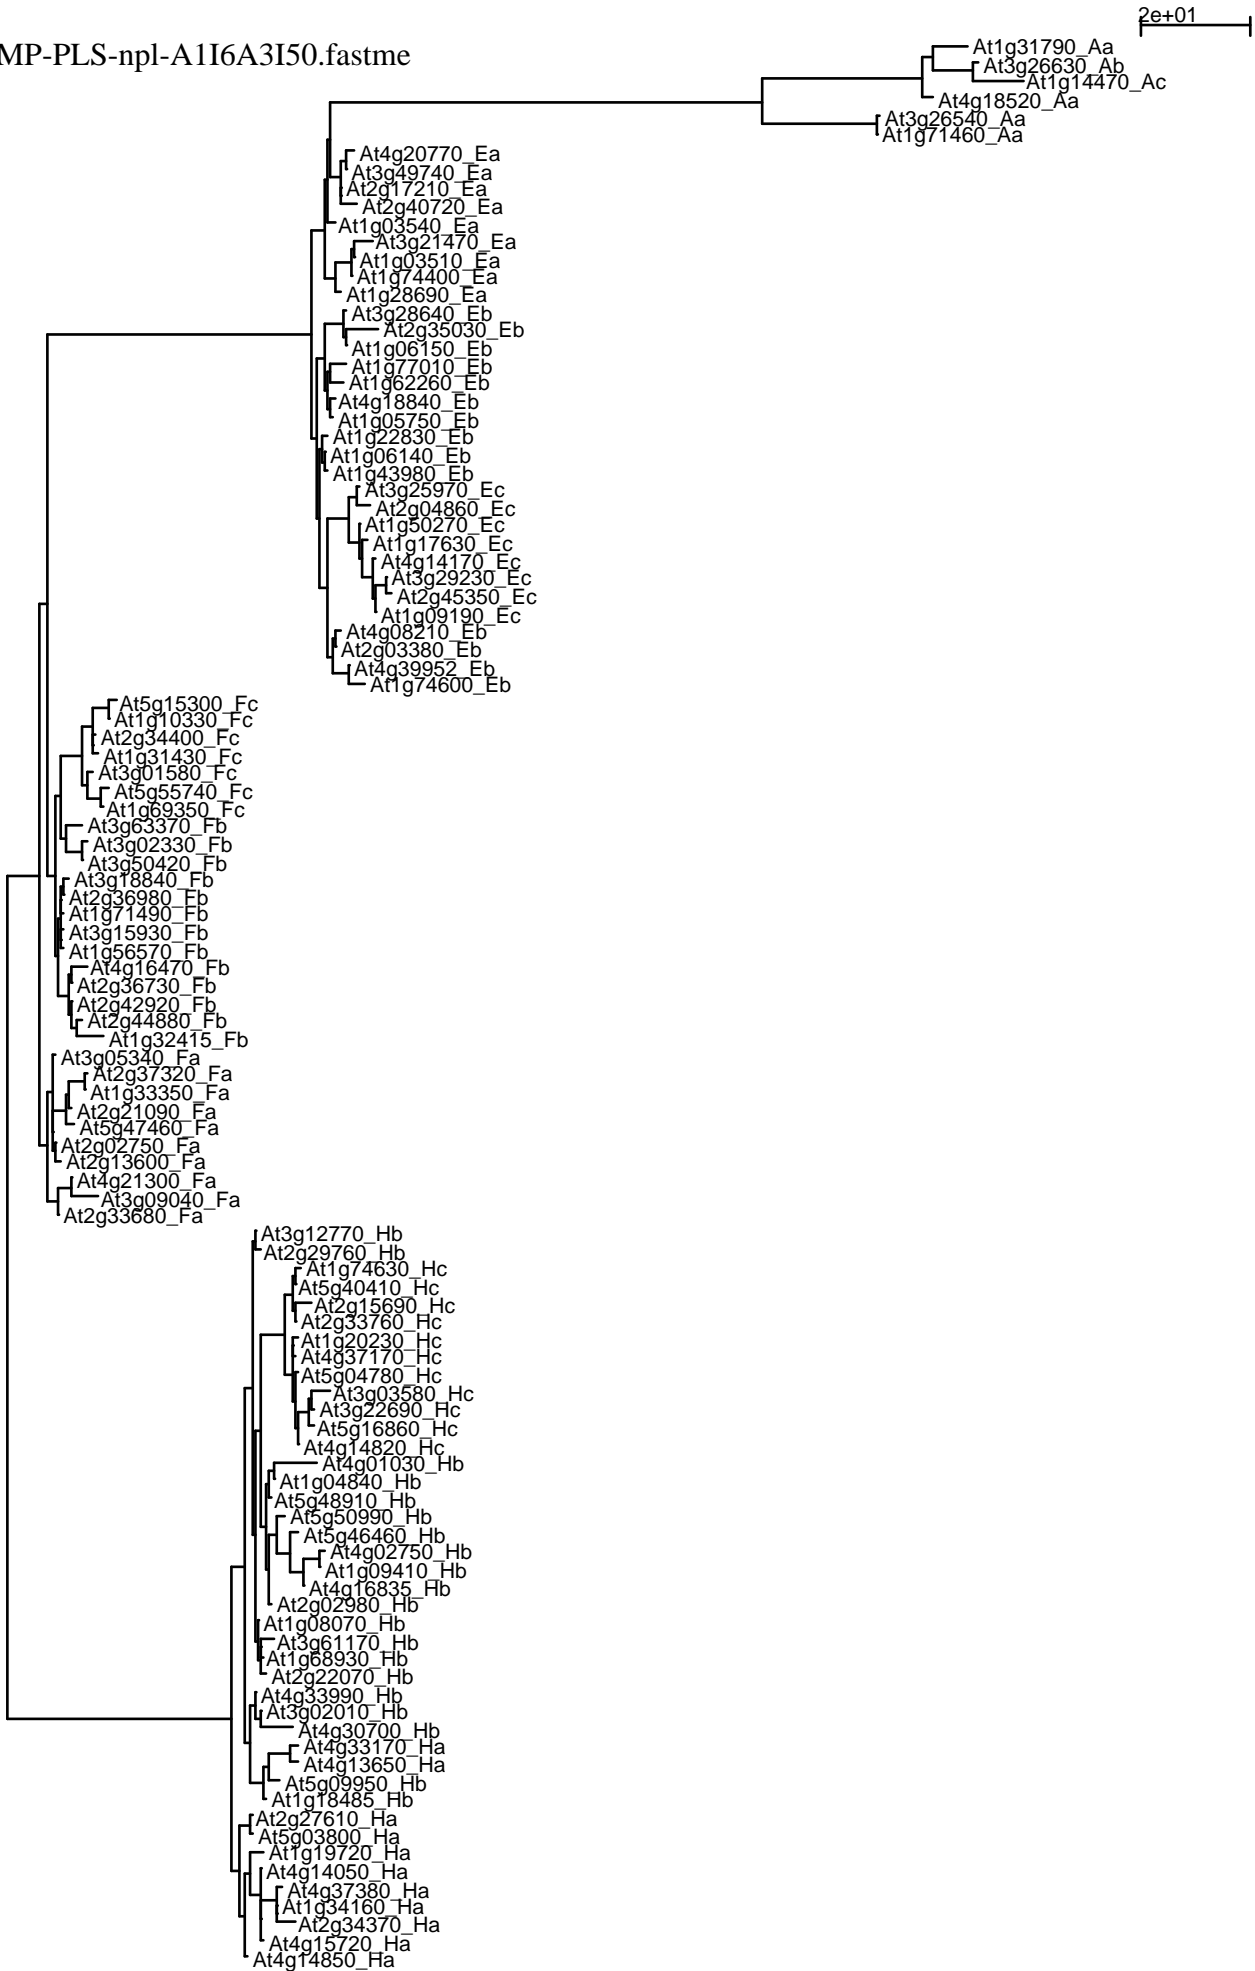

Supplement: plntphys_141_3_825__1.pdf [file plntphys_141_3_825__1.pdf]
